# Supplementary material for: Rapid synthesis of aminal-linked covalent organic frameworks for CO2/CH4 separation
Source: Royal Society of Chemistry journal article supplement (doi:10.1039/d4ra02505a), 2024-01-01
Supplement: d4ra02505a1.pdf [file d4ra02505a1.pdf]

## Electronic Supplementary Information

### Rapid synthesis of aminal-linked covalent organic frameworks for CO<sub>2</sub>/CH<sub>4</sub> separation

Jianwei Yang, Xianghao Han\* and Xiao Feng\*

Beijing Key Laboratory of Photoelectronic/Electrophotonic Conversion Materials, Key Laboratory of Cluster Science, Ministry of Education, Advanced Technology Research Institute (Jinan), Frontiers Science Center for High Energy Material, School of Chemistry and Chemical Engineering, Beijing Institute of Technology, Beijing, China

E-mail: fengxiao86@bit.edu.cn (X. Feng), hanxh5@126.com (X. Han)

#### Table of Contents

|                                                                   |    |
|-------------------------------------------------------------------|----|
| 1. Screening conditions and characterization for COF-TA-PA.....   | 2  |
| 2. Screening conditions and characterization for COF-BDA-PA ..... | 12 |
| 3. Characterization of gram-scale aminal-linked COFs.....         | 22 |
| 4. CO <sub>2</sub> and CH <sub>4</sub> adsorption isotherm .....  | 24 |
| 5. Fractional atomic coordinates .....                            | 28 |

## 1. Screening conditions and characterization for COF-TA-PA

**Table S1.** Synthesis of COF-TA-PA obtained under different solvents.

| Entry | Solvent (1 mL)                                 | Temperature | Time |
|-------|------------------------------------------------|-------------|------|
| 1     | Mesitylene (Mes)                               |             |      |
| 2     | Toluene (Tol)                                  |             |      |
| 3     | Dioxane (Dio)                                  |             |      |
| 4     | <i>o</i> -dichlorobenzene ( <i>o</i> -DCB)     | 120 °C      | 72 h |
| 5     | Mes/Dio = 1/1                                  |             |      |
| 6     | Dimethylacetamide (DMAc)/Mes = 1/1             |             |      |
| 7     | DMAc/Tol = 1/1                                 |             |      |
| 8     | Mes/ <i>n</i> -Butanol ( <i>n</i> -BuOH) = 1/1 |             |      |

**Table S2.** Synthesis of COF-TA-PA obtained under different temperatures.

| Entry | Temperature | Solvent (1 mL) | Time |
|-------|-------------|----------------|------|
| 1     | 120 °C      |                |      |
| 2     | 100 °C      | <i>o</i> -DCB  | 72 h |
| 3     | 80 °C       |                |      |

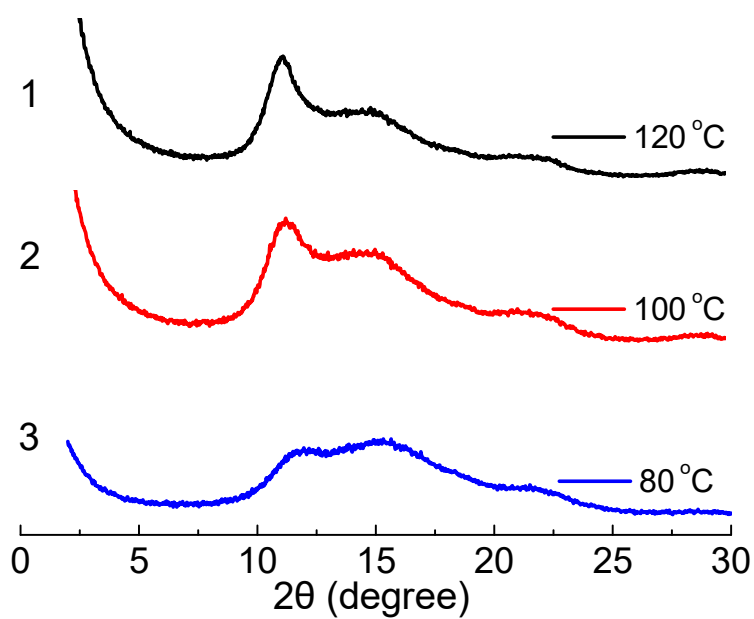

**Fig. S1.** PXRD patterns of COF-TA-PA prepared under different temperatures.

**Table S3.** Synthesis of COF-TA-PA obtained under different monomer concentrations.

| Entry | Weight (TA, mg) | Weight (PA, mg) | Temperature | Solvent (1 mL) |
|-------|-----------------|-----------------|-------------|----------------|
| 1     | 13.4            | 17.2            | 120 °C      | <i>o</i> -DCB  |
| 2     | 26.8            | 34.4            |             |                |
| 3     | 40.2            | 51.6            |             |                |
| 4     | 67              | 86              |             |                |

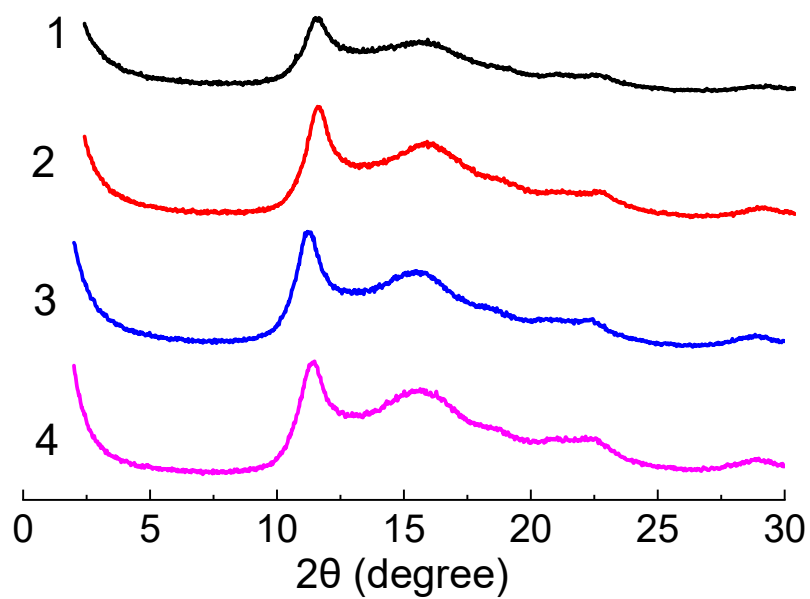

**Fig. S2.** PXRD patterns of COF-TA-PA obtained by using different monomer concentrations.

**Table S4.** Synthesis of COF-TA-PA under different equivalents of PA.

| Entry | Weight (TA, mg) | Weight (PA, mg) | Temperature | Solvent (1 mL) |
|-------|-----------------|-----------------|-------------|----------------|
| 1     | 26.8            | 34.4            | 120 °C      | <i>o</i> -DCB  |
| 2     | 26.8            | 68.8            |             |                |
| 3     | 26.8            | 103.2           |             |                |
| 4     | 26.8            | 137.6           |             |                |

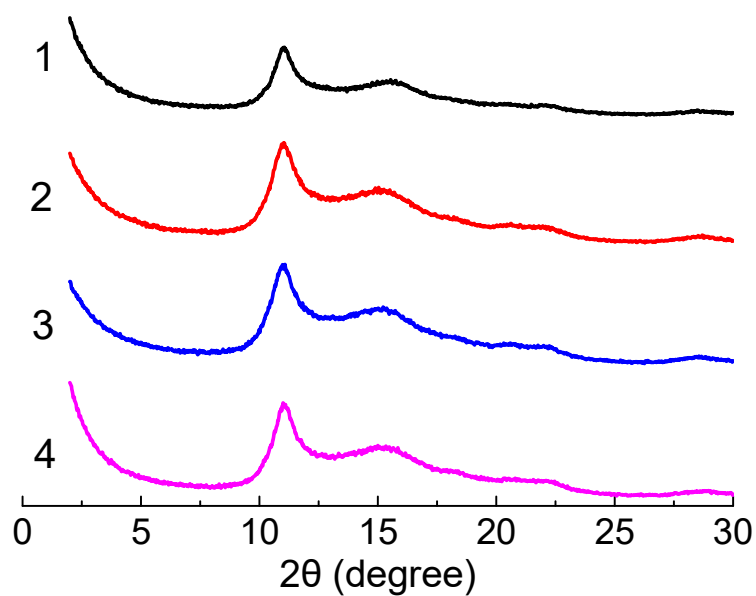

**Fig. S3.** PXRD patterns of COF-TA-PA obtained by using different equivalents of PA.

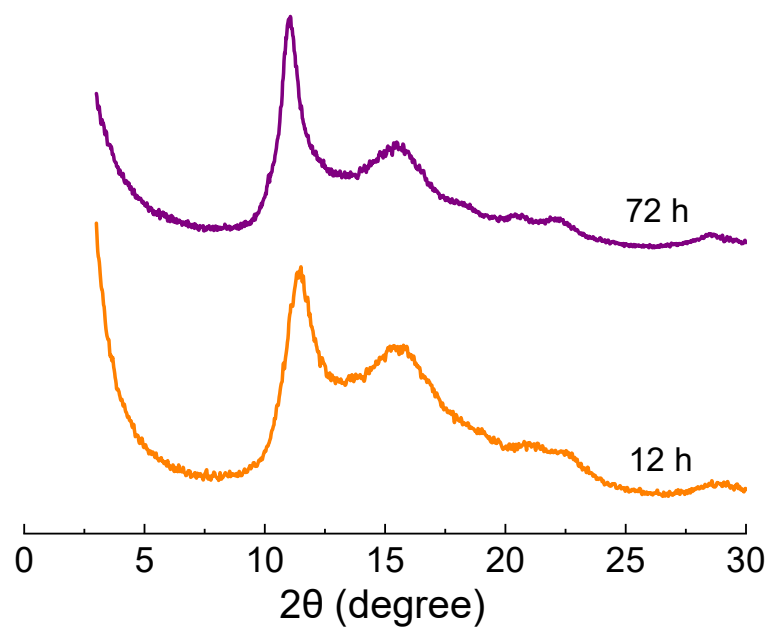

**Fig. S4.** PXRD patterns of COF-TA-PA after 12 and 72 hours.

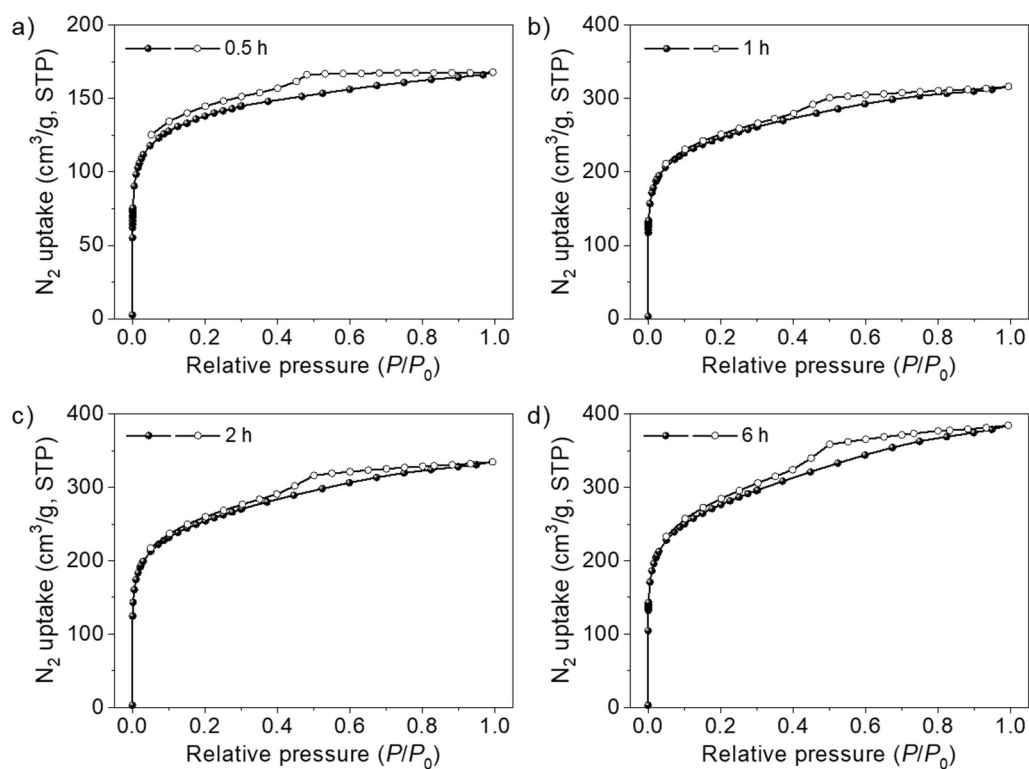

**Fig. S5.**  $N_2$  adsorption-desorption isotherms (77 K) of COF-TA-PA at different time intervals.

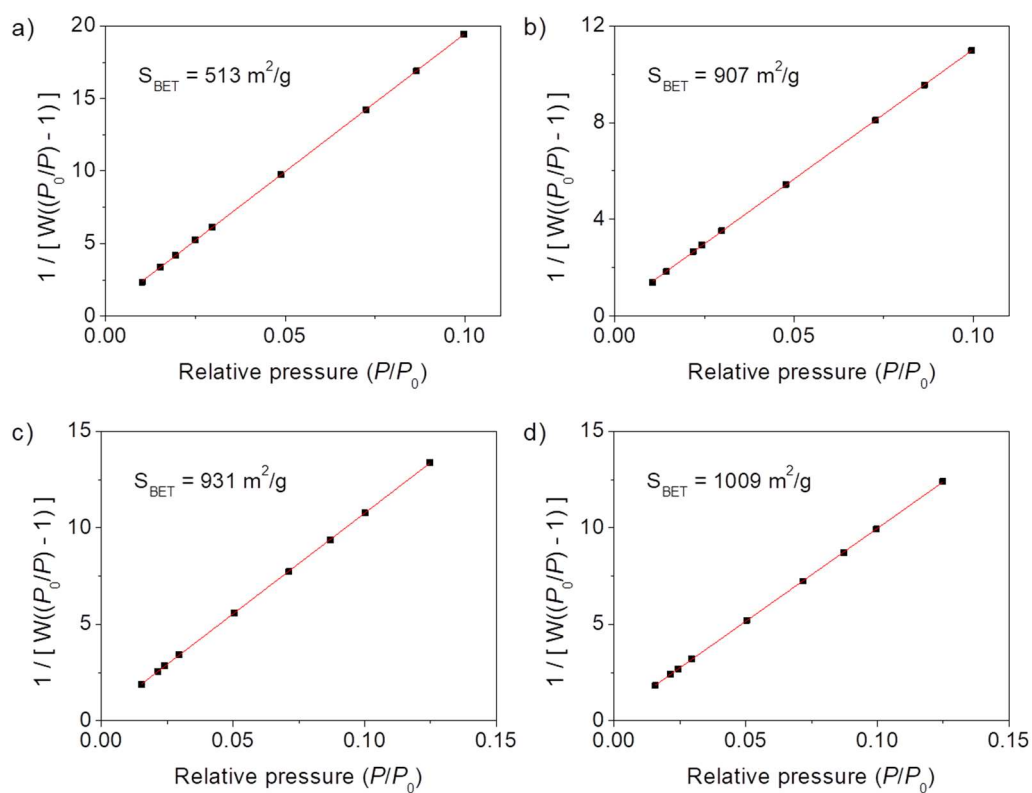

**Fig. S6.** BET surface area plots of COF-TA-PA at (a) 0.5 h, (b) 1 h, (c) 2 h, and (d) 6 h.

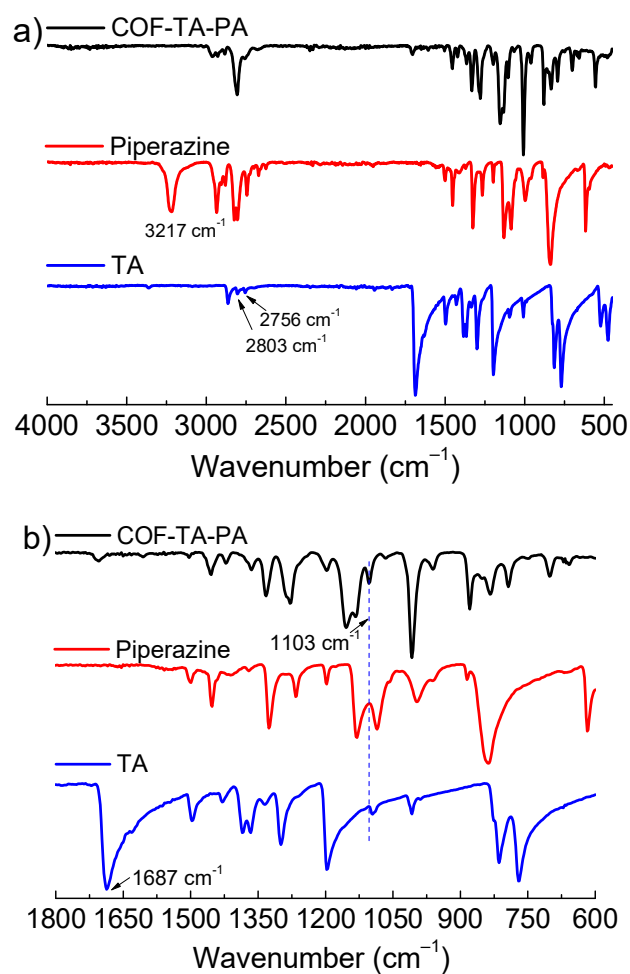

**Fig. S7.** FT-IR spectra of **COF-TA-PA** (black), piperazine (red), and terephthalaldehyde (TA, blue) at the wavenumber of (a) 4000–450  $\text{cm}^{-1}$  and (b) 1800–600  $\text{cm}^{-1}$ .



**Table S5.** Peak assignment and notes for COF-TA-PA.

| <b>Peak (cm<sup>-1</sup>)</b> | <b>Assignment and notes for COF-BDA-PA</b>            |
|-------------------------------|-------------------------------------------------------|
| 3016                          | aromatic C–H stretch                                  |
| 2962 and 2929                 | aliphatic C–H stretch                                 |
| 2806 and 2756                 | C–H stretch from residual H–C=O in COF terminal group |
| 1704                          | residual C=O stretch from COF terminal group          |
| 1504                          | phenyl ring C=C vibrational mode (v <sub>a</sub> )    |
| 1456                          | phenyl ring C=C vibrational mode (v <sub>b</sub> )    |
| 1332                          | phenyl ring C–C vibrational mode                      |
| 1154                          | C–Ph stretching                                       |
| <b>1103</b>                   | <b>C(H)–N stretching</b>                              |
| 961                           | aromatic ring stretching                              |
| 879                           | aromatic C-H out of plane wagging                     |

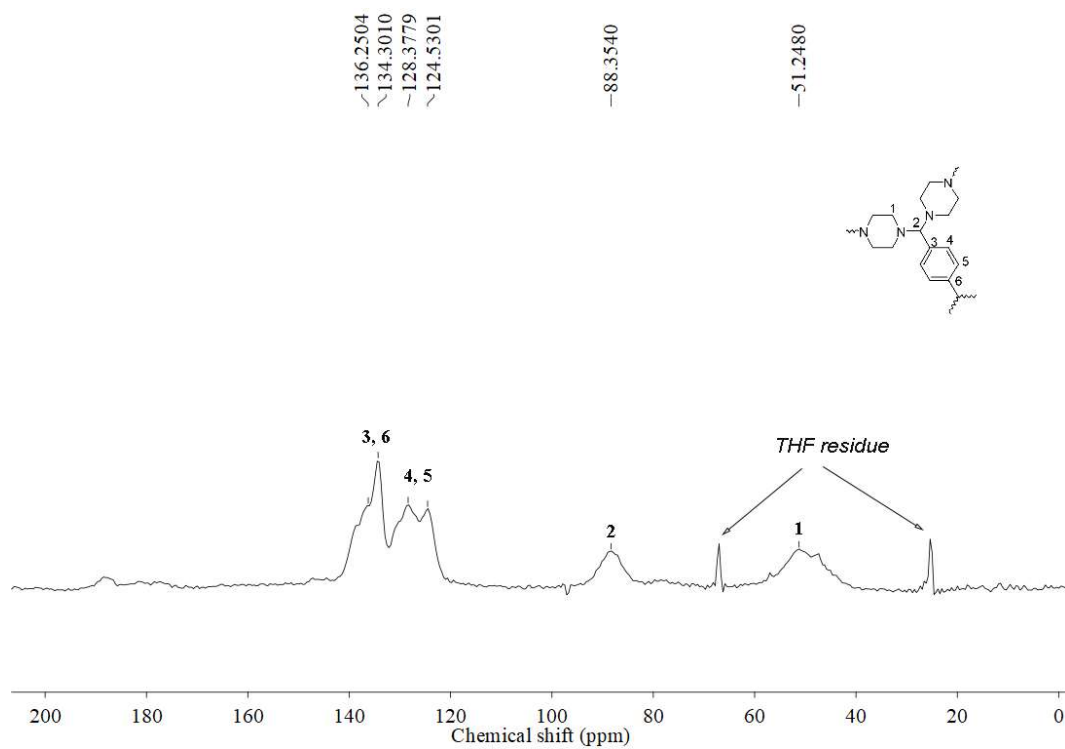

**Fig. S8.** Solid-state  $^{13}\text{C}$  CP/MAS NMR spectrum of COF-TA-PA.

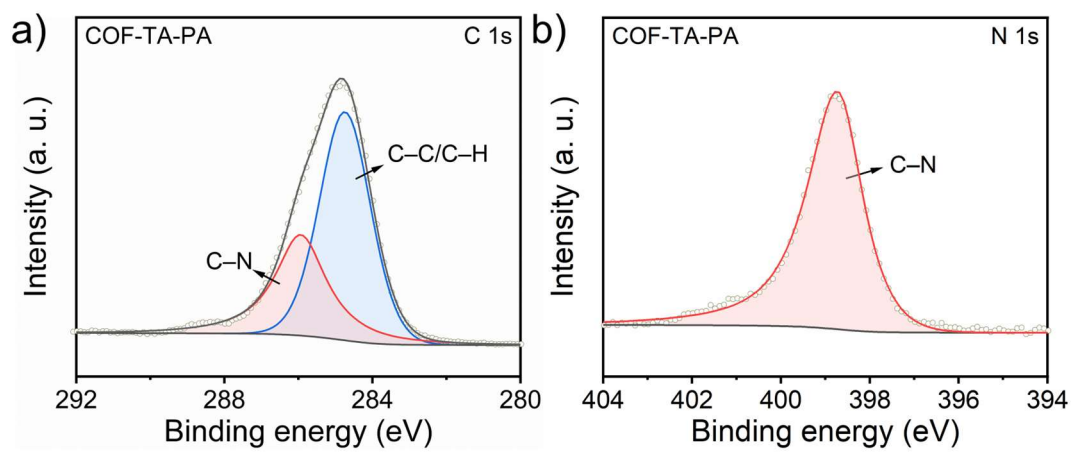

**Fig. S9.** (a) C 1s and (b) N 1s XPS spectra of **COF-TA-PA**.

## 2. Screening conditions and characterization for COF-BDA-PA

**Table S6.** Synthesis of COF-BDA-PA obtained under different solvents.

| Entry | Solvent (1 mL) | Temperature | Time |
|-------|----------------|-------------|------|
| 1     | <i>o</i> -DCB  |             |      |
| 2     | Tol            |             |      |
| 3     | Mes/Dio = 1/1  | 120 °C      | 72 h |
| 4     | DMAc/Mes = 1/1 |             |      |
| 5     | DMAc/Tol= 1/1  |             |      |

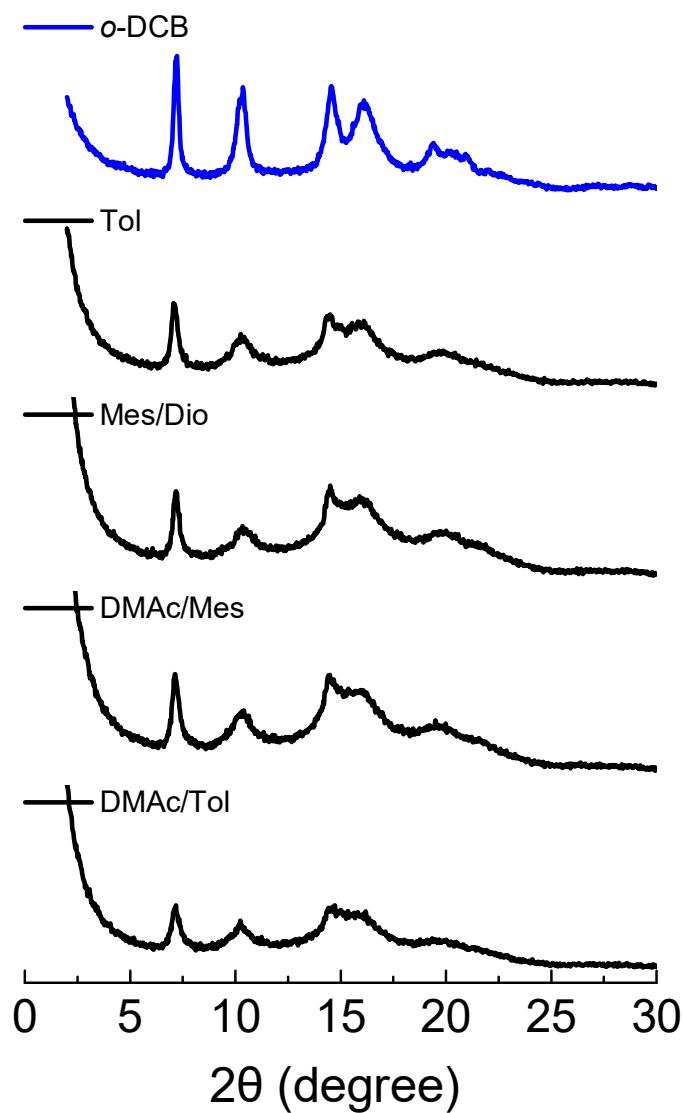

**Fig. S10.** PXRD patterns of COF-BDA-PA obtained under different solvents.

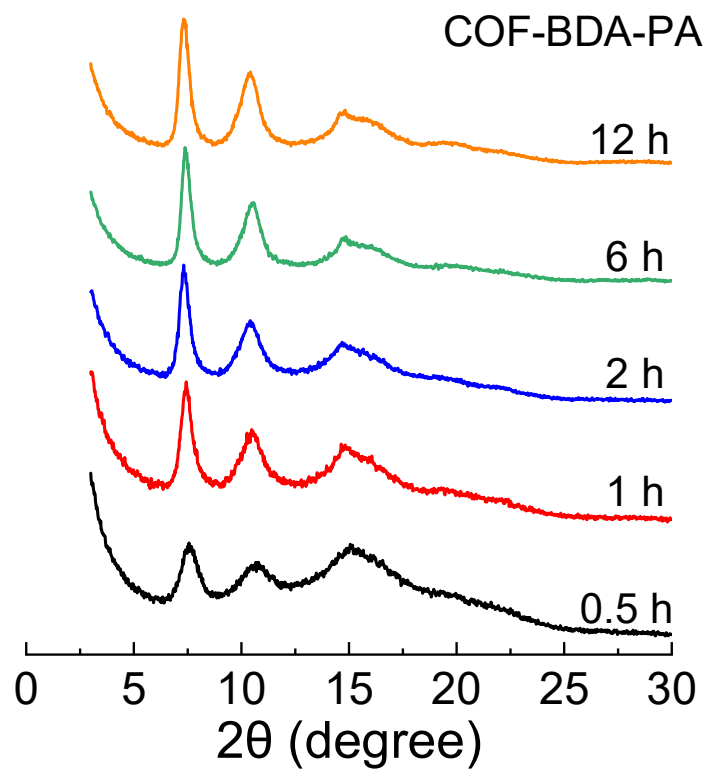

**Fig. S11.** PXRD patterns of **COF-BDA-PA** obtained by using different reaction times.

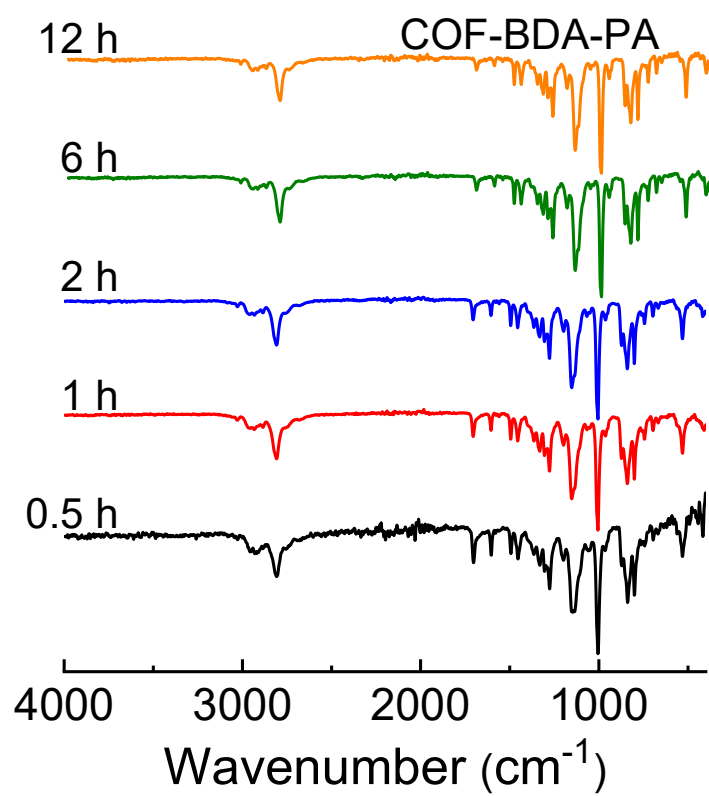

**Fig. S12.** FT-IR spectra of COF-BDA-PA obtained by using different reaction times.

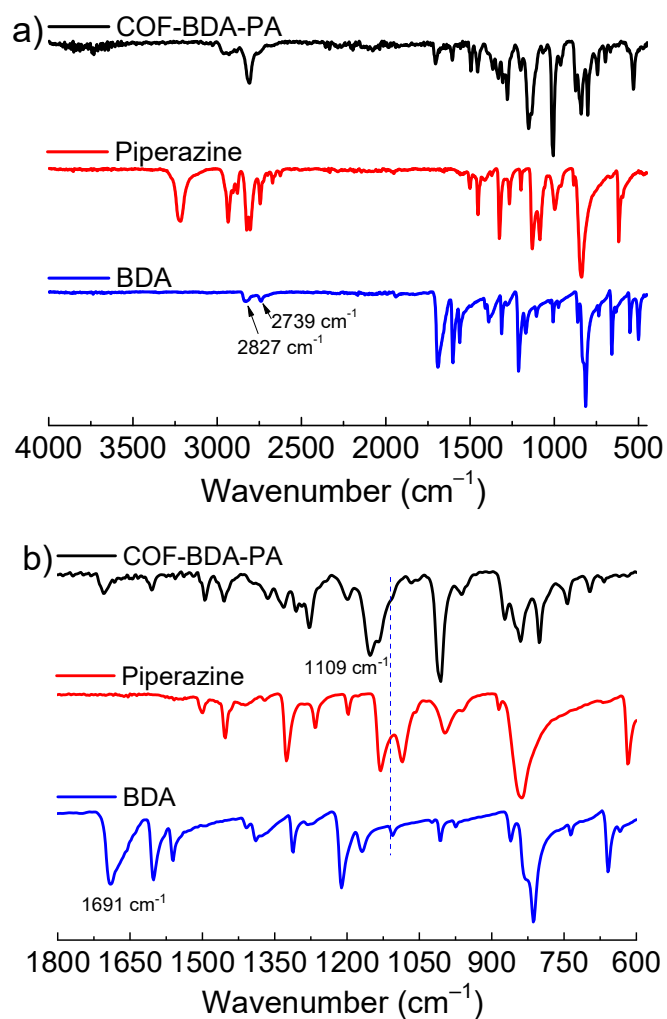

**Fig. S13.** FT-IR spectra of **COF-BDA-PA** (black), piperazine (red), and 4,4'-Biphenyldicarboxaldehyde (BDA, blue) at the wavenumber of (a) 4000–450  $\text{cm}^{-1}$  and (b) 1800–600  $\text{cm}^{-1}$ .

**Table S7.** Peak assignment and notes for COF-BDA-PA.

| <b>Peak (cm<sup>-1</sup>)</b> | <b>Assignment and notes for COF-BDA-PA</b>            |
|-------------------------------|-------------------------------------------------------|
| 3027                          | aromatic C–H stretch                                  |
| 2960 and 2931                 | aliphatic C–H stretch                                 |
| 2810 and 2753                 | C–H stretch from residual H–C=O in COF terminal group |
| 1704                          | residual C=O stretch from COF terminal group          |
| 1495                          | phenyl ring C=C vibrational mode (v <sub>a</sub> )    |
| 1455                          | phenyl ring C=C vibrational mode (v <sub>b</sub> )    |
| 1305                          | phenyl ring C–C vibrational mode                      |
| 1153                          | C–Ph stretching                                       |
| <b>1109</b>                   | <b>C(H)–N stretching</b>                              |
| 962                           | aromatic ring stretching                              |
| 873                           | aromatic C-H out of plane wagging                     |



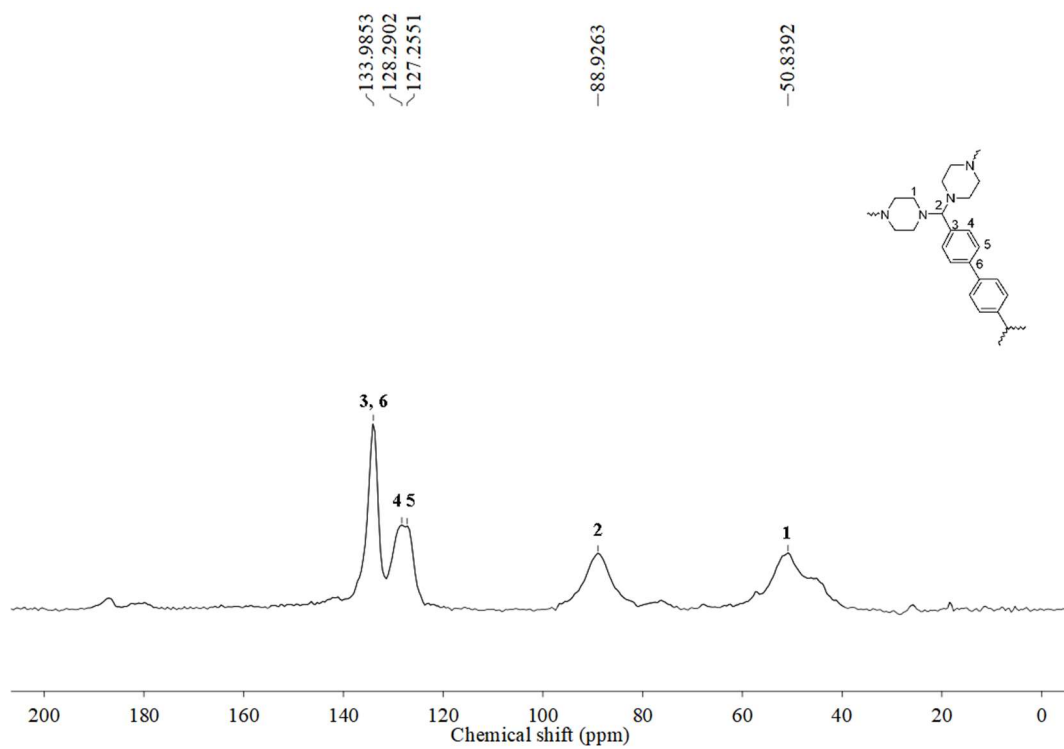

**Fig. S14.** Solid-state  $^{13}\text{C}$  CP/MAS NMR spectrum of **COF-BDA-PA**.

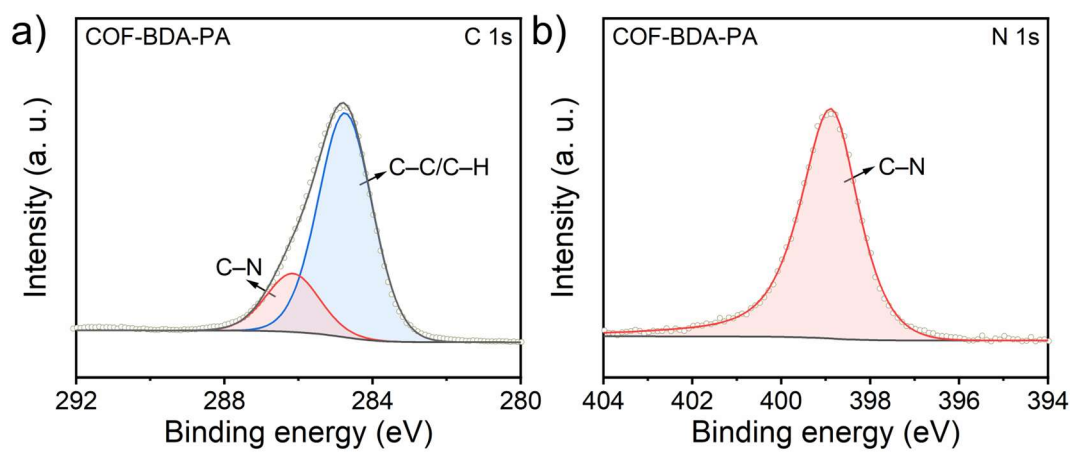

**Fig. S15.** (a) C 1s and (b) N 1s XPS spectra of **COF-BDA-PA**.

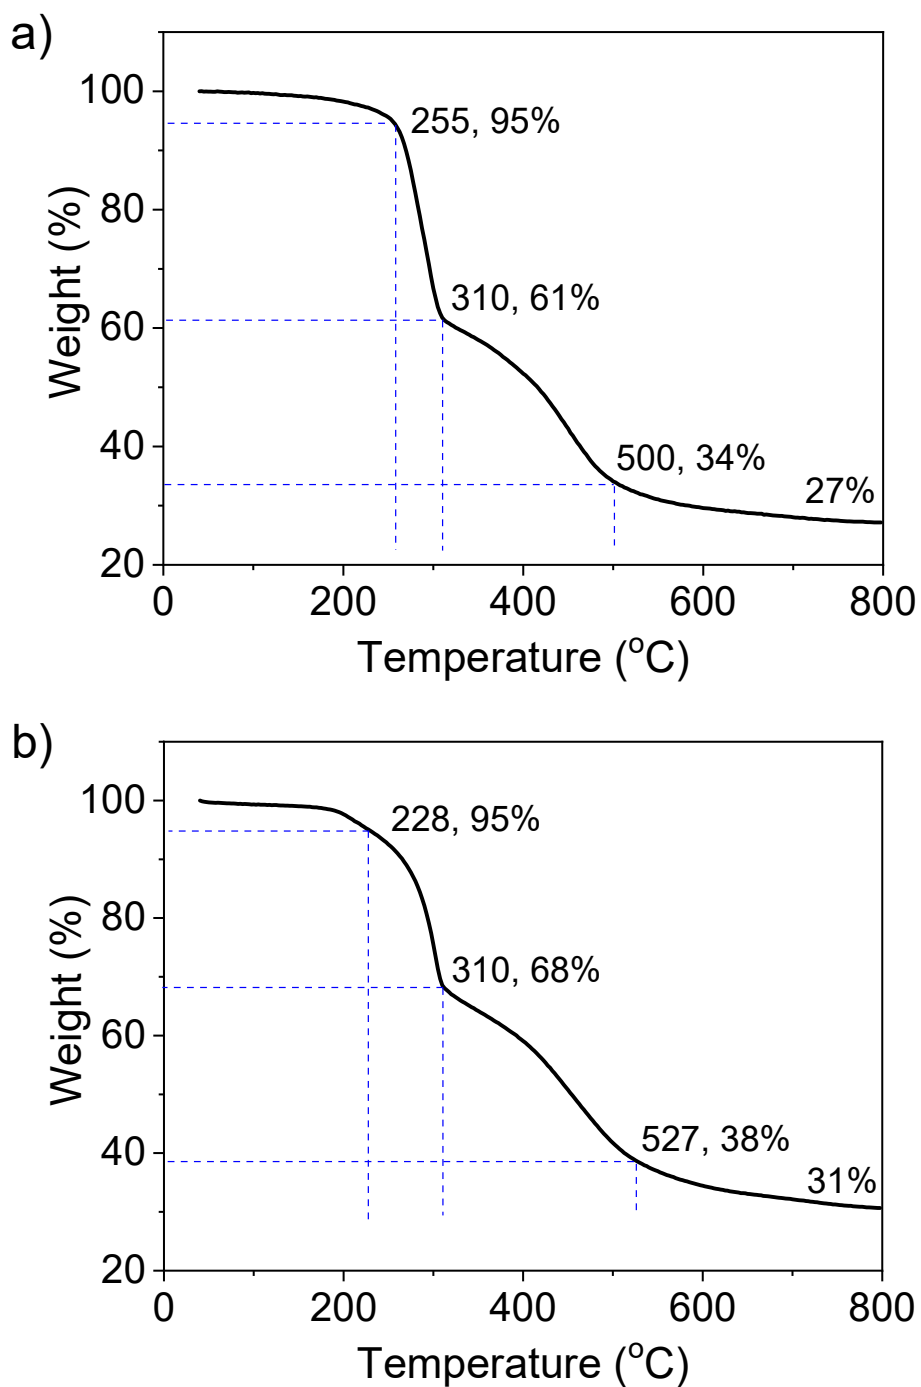

**Fig. S16.** TGA profiles of (a) COF-TA-PA and (b) COF-BDA-PA.

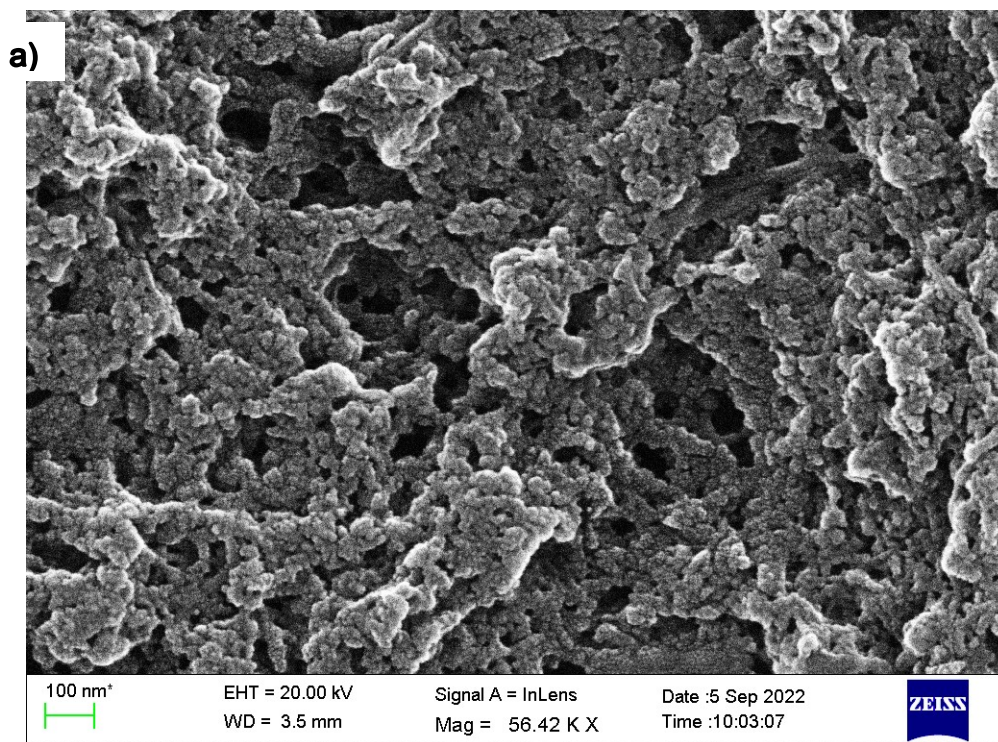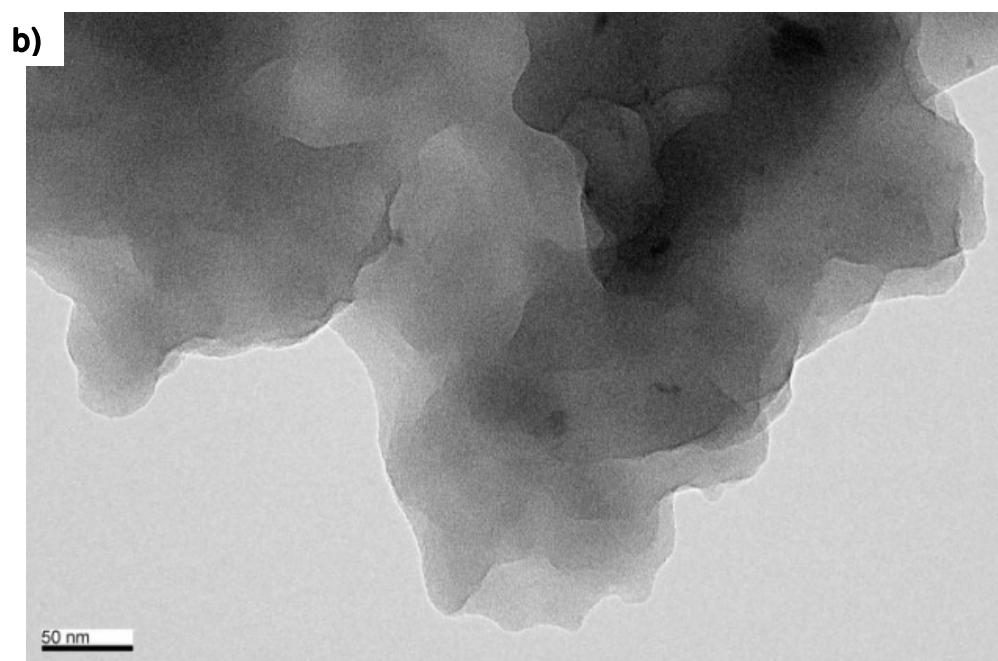

**Fig. S17.** (a) Field-emission SEM and (b) TEM images of **COF-TA-PA**.

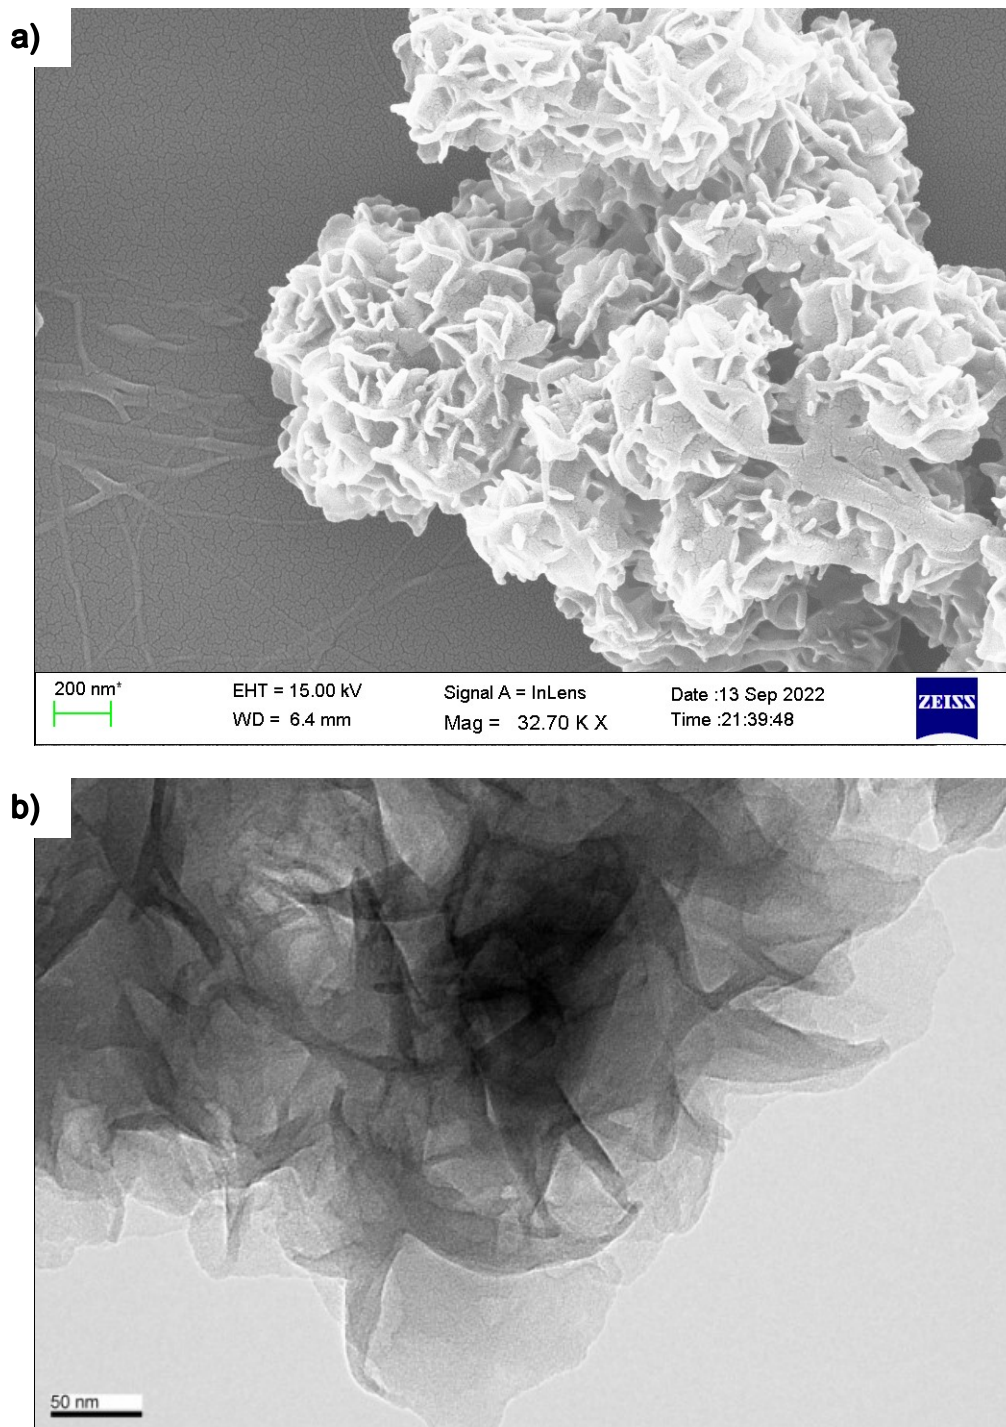

**Fig. S18.** (a) Field-emission SEM and (b) TEM images of **COF-BDA-PA**.

### 3. Characterization of gram-scale aminal-linked COFs

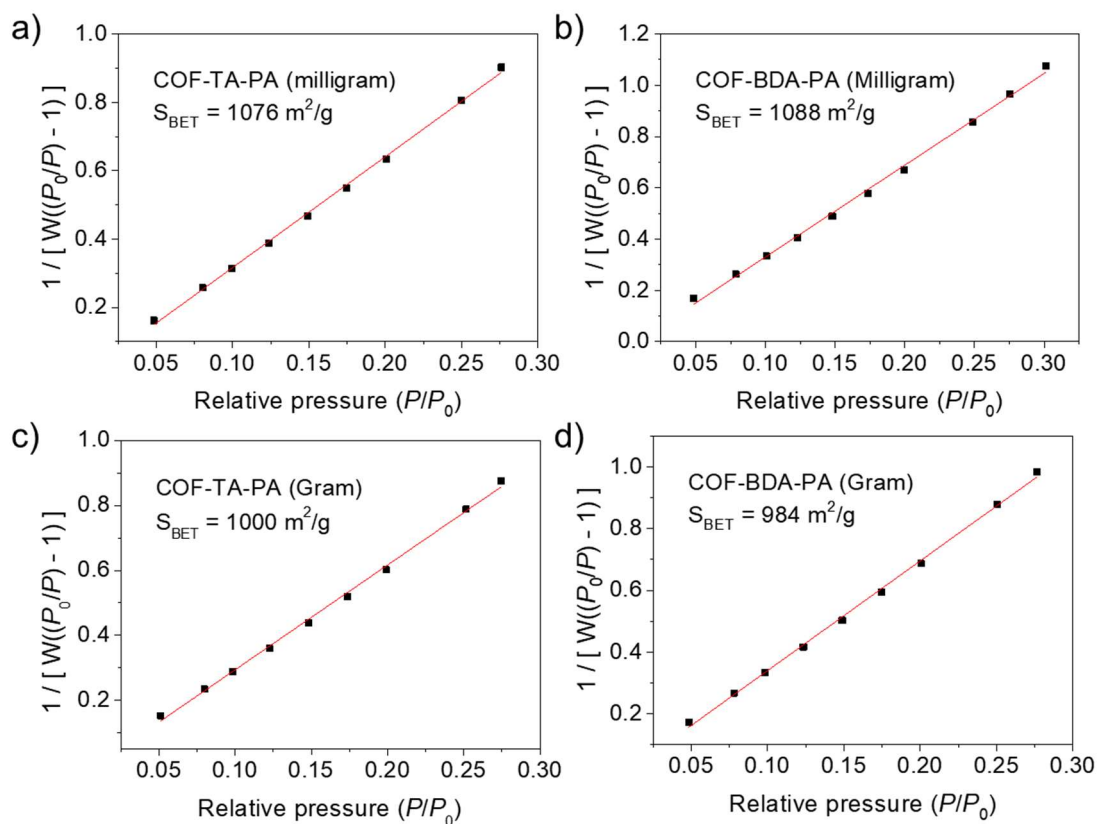

**Fig. S19.** BET surface area plots of (a, b) milligram-scale and (c, d) gram-scale synthesis of COF-TA-PA and COF-BDA-PA calculated from  $\text{N}_2$  adsorption isotherms.

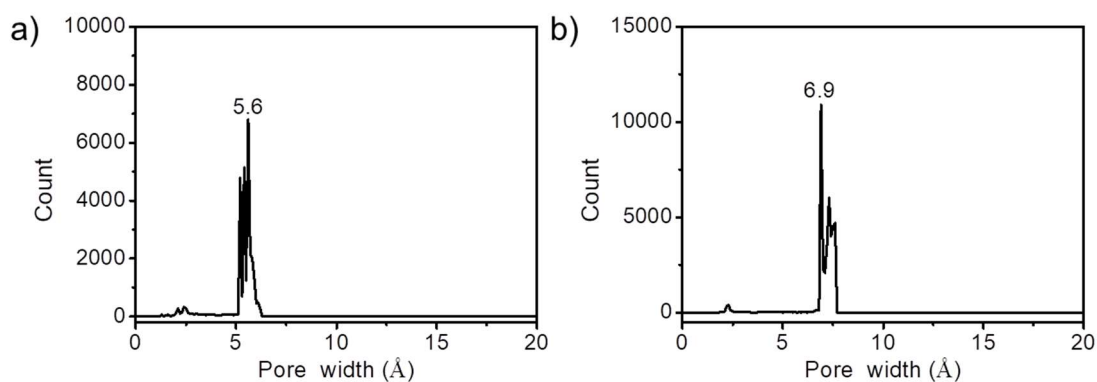

**Fig. S20.** Illustration of the theoretical pore sizes for (a) COF-TA-PA and (b) COF-BDA-PA with eclipsed AA stacking based on Zeo<sup>++</sup> calculations.

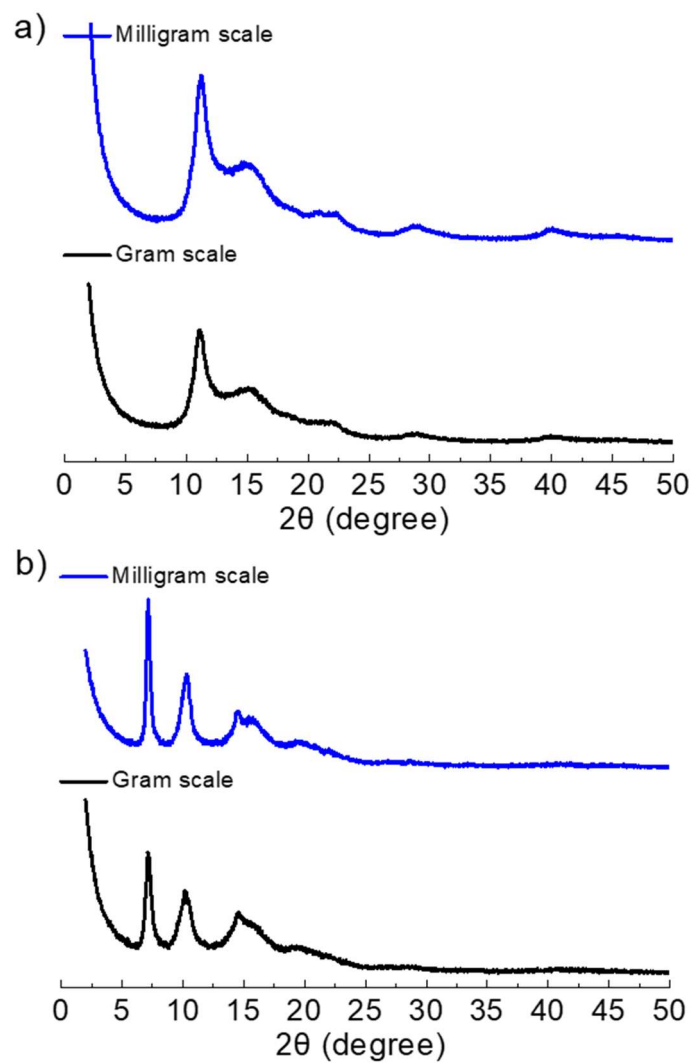

**Fig. S21.** PXRD patterns of (a) **COF-TA-PA** and (b) **COF-BDA-PA** on a milligram scale (blue) and gram scale (black) synthesis.

#### 4. CO<sub>2</sub> and CH<sub>4</sub> adsorption isotherm

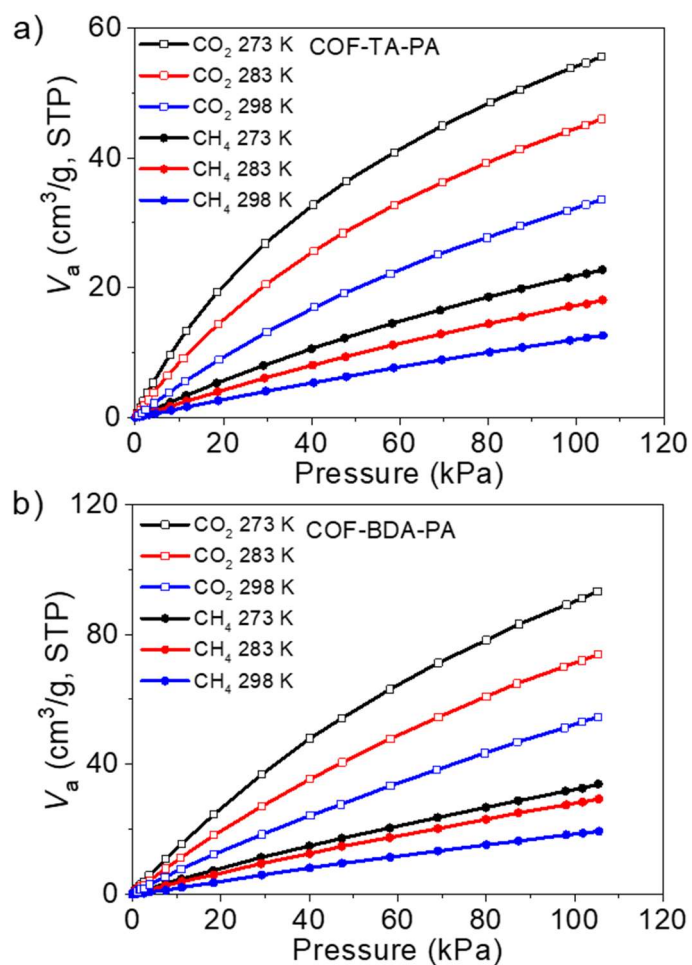

**Fig. S22.** CO<sub>2</sub> and CH<sub>4</sub> sorption isotherm curves of (a) **COF-TA-PA** and (b) **COF-BDA-PA** at 273, 283, and 298 K, respectively.



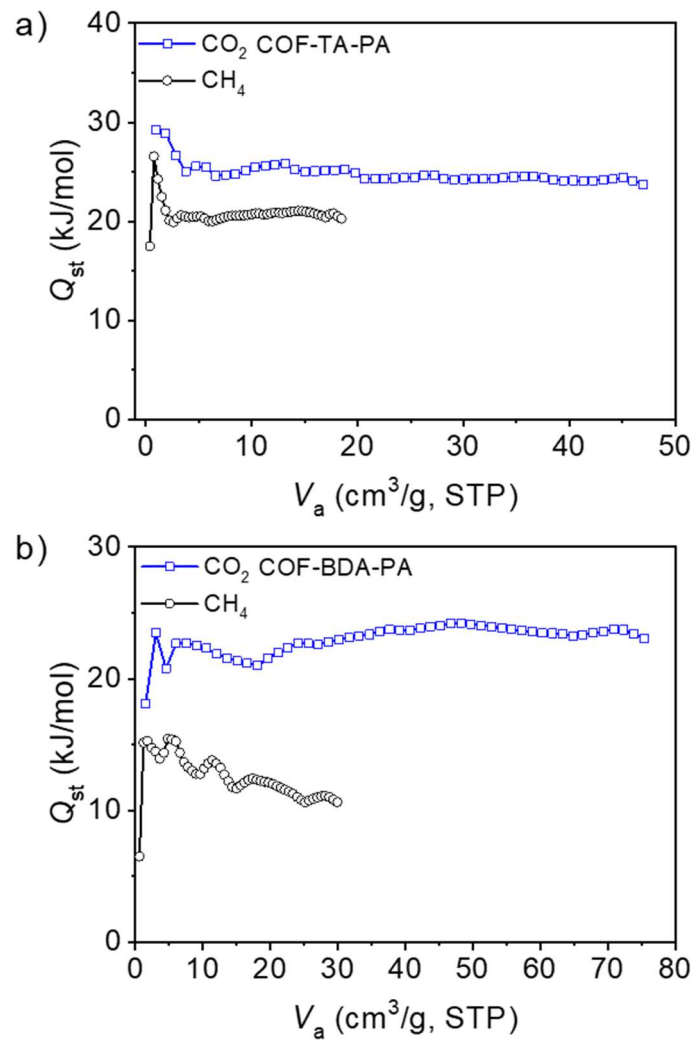

**Fig. S23.** The adsorption enthalpy ( $Q_{st}$ ) for  $\text{CO}_2$  for (a) **COF-TA-PA**, and (b) **COF-BDA-PA** calculated at low coverage by the Clausius–Clapeyron equation.

**Table S8.** Fitting parameters of the dual-site Langmuir and single site Langmuir-Freundlich model.

|                   | Parameters              | q <sub>1</sub> | b <sub>1</sub> | n <sub>1</sub> | q <sub>2</sub> | b <sub>2</sub> | n <sub>2</sub> | R <sup>2</sup> |
|-------------------|-------------------------|----------------|----------------|----------------|----------------|----------------|----------------|----------------|
| <b>COF-TA-PA</b>  | CO <sub>2</sub> (273 K) | 4.34109        | 0.00395        | --             | 1.57687        | 0.03015        | --             | 1              |
|                   | CH <sub>4</sub> (273 K) | 1.6728         | 0.00411        | --             | 1.6728         | 0.00411        | --             | 0.99998        |
|                   | CO <sub>2</sub> (298 K) | 4.05398        | 0.00608        | 0.97898        | --             | --             | --             | 0.99997        |
|                   | CH <sub>4</sub> (298K)  | 2.61698        | 0.00223        | 1.03198        | --             | --             | --             | 0.99997        |
| <b>COF-BDA-PA</b> | CO <sub>2</sub> (273 K) | 10.24658       | 0.00676        | 0.99071        | --             | --             | --             | 0.99998        |
|                   | CH <sub>4</sub> (273 K) | 12.58062       | 0.00181        | 0.92652        | --             | --             | --             | 0.99993        |
|                   | CO <sub>2</sub> (298 K) | 19.68224       | 0.00192        | 0.92291        | --             | --             | --             | 0.99997        |
|                   | CH <sub>4</sub> (298K)  | 3.1178         | 0.00201        | 1.12576        | --             | --             | --             | 0.99984        |

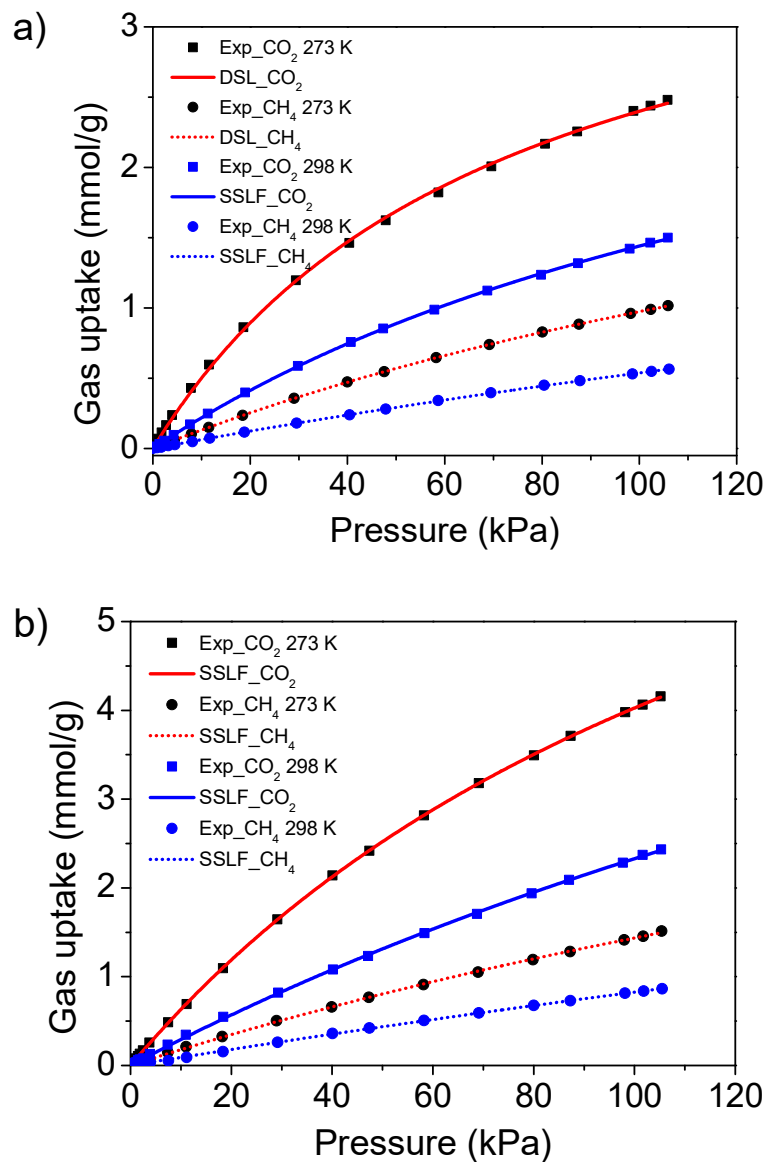

**Fig. S24.** Experimental and fitted isotherms of CO<sub>2</sub> and CH<sub>4</sub> for (a) COF-TA-PA and (b) COF-BDA-PA measured at 273 (red) and 298 K (blue).

## 5. Fractional atomic coordinates

**Table S9.** The space groups and cell parameters of the possible structures for COF-TA-PA

| Structure | Space Group | Cell Parameters                                                                                                           |
|-----------|-------------|---------------------------------------------------------------------------------------------------------------------------|
| AA        | P1          | $a = 17.41 \text{ \AA}, b = 16.23 \text{ \AA}, c = 5.86 \text{ \AA}, \alpha = \beta = 90^\circ$ and $\gamma = 120^\circ$  |
| AB        | P1          | $a = 17.41 \text{ \AA}, b = 16.23 \text{ \AA}, c = 14.00 \text{ \AA}, \alpha = \beta = 90^\circ$ and $\gamma = 120^\circ$ |

**Table S10.** The space groups and cell parameters of the possible structures for COF-BDA-PA

| Structure | Space Group | Cell Parameters                                                                                                            |
|-----------|-------------|----------------------------------------------------------------------------------------------------------------------------|
| AA        | P1          | $a = 9.79 \text{ \AA}, b = 13.96 \text{ \AA}, c = 6.45 \text{ \AA}, \alpha = \beta = 90^\circ$ and $\gamma = 114.6^\circ$  |
| AB        | P1          | $a = 9.79 \text{ \AA}, b = 13.96 \text{ \AA}, c = 13.79 \text{ \AA}, \alpha = \beta = 90^\circ$ and $\gamma = 114.6^\circ$ |

**Table S11.** Fractional atomic coordinates for the unit cell of **COF-TA-PA** with AA stacking.

| P1 (C1-1)                                                                                                                                                         |             |         |          |          |         |             |         |          |          |
|-------------------------------------------------------------------------------------------------------------------------------------------------------------------|-------------|---------|----------|----------|---------|-------------|---------|----------|----------|
| $a = 17.41 \text{ \AA}, b = 16.23 \text{ \AA}, c = 5.86 \text{ \AA}, \alpha = \beta = 90^\circ$ and $\gamma = 120^\circ$ ; $R_p = 2.13 \%$ , $R_{wp} = 2.70 \%$ . |             |         |          |          |         |             |         |          |          |
| Element                                                                                                                                                           | Atom number | x       | y        | z        | Element | Atom number | x       | y        | z        |
| H                                                                                                                                                                 | 1           | 1.73077 | -0.03399 | -0.36366 | H       | 64          | 1.34393 | -0.18061 | 0.35209  |
| H                                                                                                                                                                 | 2           | 1.63521 | -0.14702 | -0.32488 | H       | 65          | 1.21274 | -0.32566 | 0.25763  |
| H                                                                                                                                                                 | 3           | 1.59232 | -0.02848 | -0.28034 | H       | 66          | 1.4915  | -0.06757 | 0.28824  |
| H                                                                                                                                                                 | 4           | 1.68226 | 0.04114  | -0.09875 | C       | 1           | 1.68278 | -0.08164 | -0.238   |
| H                                                                                                                                                                 | 5           | 1.54869 | -0.22119 | 0.07572  | C       | 2           | 1.63321 | -0.03197 | -0.14326 |
| H                                                                                                                                                                 | 6           | 1.56259 | -0.16828 | 0.34752  | C       | 3           | 1.58796 | -0.1556  | 0.17298  |
| H                                                                                                                                                                 | 7           | 1.68786 | -0.19323 | 0.24602  | C       | 4           | 1.68584 | -0.13218 | 0.17491  |
| H                                                                                                                                                                 | 8           | 1.72403 | -0.07142 | 0.28636  | C       | 5           | 1.81565 | -0.09923 | -0.10471 |
| H                                                                                                                                                                 | 9           | 1.82637 | -0.09013 | -0.2896  | C       | 6           | 1.81416 | -0.19011 | -0.04534 |
| H                                                                                                                                                                 | 10          | 1.96195 | 0.12703  | 0.32657  | C       | 7           | 1.96836 | 0.15302  | 0.15107  |
| H                                                                                                                                                                 | 11          | 1.96257 | 0.21683  | 0.15778  | C       | 8           | 1.89039 | 0.07699  | 0.00677  |
| H                                                                                                                                                                 | 12          | 1.89383 | 0.10397  | -0.16636 | C       | 9           | 1.98123 | 0.00541  | -0.09295 |
| H                                                                                                                                                                 | 13          | 1.82887 | 0.06553  | 0.08407  | C       | 10          | 2.05947 | 0.08306  | 0.04538  |
| H                                                                                                                                                                 | 14          | 1.98811 | 0.02846  | -0.27131 | C       | 11          | 1.84157 | -0.20386 | 0.17208  |
| H                                                                                                                                                                 | 15          | 1.98695 | -0.05868 | -0.0885  | C       | 12          | 1.84428 | -0.2871  | 0.22327  |
| H                                                                                                                                                                 | 16          | 2.11983 | 0.09349  | -0.03796 | C       | 13          | 1.81911 | -0.36003 | 0.05888  |
| H                                                                                                                                                                 | 17          | 2.05836 | 0.05729  | 0.21879  | C       | 14          | 1.79081 | -0.34675 | -0.15774 |
| H                                                                                                                                                                 | 18          | 1.86066 | -0.15222 | 0.29431  | C       | 15          | 1.78737 | -0.26387 | -0.20811 |
| H                                                                                                                                                                 | 19          | 1.86556 | -0.29382 | 0.3812   | C       | 16          | 1.82218 | -0.44923 | 0.11205  |
| H                                                                                                                                                                 | 20          | 1.77213 | -0.39833 | -0.28005 | C       | 17          | 1.64188 | -0.69007 | -0.15317 |
| H                                                                                                                                                                 | 21          | 1.7654  | -0.25742 | -0.36535 | C       | 18          | 1.72884 | -0.62447 | -0.02486 |
| H                                                                                                                                                                 | 22          | 1.82507 | -0.45424 | 0.29828  | C       | 19          | 1.65498 | -0.54812 | 0.17118  |
| H                                                                                                                                                                 | 23          | 1.63969 | -0.75741 | -0.18762 | C       | 20          | 1.56814 | -0.61341 | 0.04017  |
| H                                                                                                                                                                 | 24          | 1.64281 | -0.65761 | -0.31766 | C       | 21          | 1.47703 | -0.78591 | -0.10841 |
| H                                                                                                                                                                 | 25          | 1.78367 | -0.61266 | -0.13663 | C       | 22          | 1.39389 | -0.7861  | -0.03862 |
| H                                                                                                                                                                 | 26          | 1.73089 | -0.66119 | 0.12947  | C       | 23          | 1.55481 | -0.95061 | 0.12239  |
| H                                                                                                                                                                 | 27          | 1.6564  | -0.4812  | 0.20636  | C       | 24          | 1.50249 | -0.8981  | 0.16629  |
| H                                                                                                                                                                 | 28          | 1.65392 | -0.58073 | 0.33545  | C       | 25          | 1.44475 | -0.95244 | -0.23875 |
| H                                                                                                                                                                 | 29          | 1.56542 | -0.57776 | -0.11576 | C       | 26          | 1.42535 | -1.05039 | -0.14559 |
| H                                                                                                                                                                 | 30          | 1.51315 | -0.62423 | 0.14995  | C       | 27          | 1.34811 | -0.76006 | -0.19634 |
| H                                                                                                                                                                 | 31          | 1.48146 | -0.77801 | -0.29467 | C       | 28          | 1.26874 | -0.76259 | -0.13654 |
| H                                                                                                                                                                 | 32          | 1.5806  | -0.95983 | 0.28475  | C       | 29          | 1.23299 | -0.78895 | 0.08555  |
| H                                                                                                                                                                 | 33          | 1.61201 | -0.90556 | 0.01537  | C       | 30          | 1.27977 | -0.81293 | 0.24501  |
| H                                                                                                                                                                 | 34          | 1.54431 | -0.83248 | 0.26042  | C       | 31          | 1.35905 | -0.81072 | 0.1848   |
| H                                                                                                                                                                 | 35          | 1.44539 | -0.94326 | 0.27347  | C       | 32          | 1.14637 | -0.79517 | 0.14976  |

|   |    |         |          |          |   |    |         |          |          |
|---|----|---------|----------|----------|---|----|---------|----------|----------|
| H | 36 | 1.5004  | -0.92665 | -0.35759 | C | 33 | 1.15845 | -0.59427 | -0.23092 |
| H | 37 | 1.3866  | -0.9611  | -0.33121 | C | 34 | 1.10758 | -0.69384 | -0.11935 |
| H | 38 | 1.41389 | -1.0974  | -0.29073 | C | 35 | 1.22382 | -0.61369 | 0.19079  |
| H | 39 | 1.36457 | -1.08053 | -0.04381 | C | 36 | 1.20946 | -0.52699 | 0.17037  |
| H | 40 | 1.37264 | -0.73855 | -0.35722 | C | 37 | 1.17126 | -0.43225 | -0.13035 |
| H | 41 | 1.23709 | -0.74502 | -0.25692 | C | 38 | 1.25455 | -0.3417  | -0.07126 |
| H | 42 | 1.25541 | -0.8338  | 0.40626  | C | 39 | 0.94485 | -0.50557 | 0.15362  |
| H | 43 | 1.39116 | -0.82768 | 0.30532  | C | 40 | 1.00997 | -0.52433 | 0.01397  |
| H | 44 | 1.13949 | -0.80347 | 0.33553  | C | 41 | 1.06596 | -0.36864 | -0.17191 |
| H | 45 | 1.11822 | -0.59273 | -0.37197 | C | 42 | 0.99361 | -0.35595 | -0.04948 |
| H | 46 | 1.22128 | -0.58299 | -0.29916 | C | 43 | 1.32683 | -0.29929 | -0.22504 |
| H | 47 | 1.10063 | -0.74694 | -0.24495 | C | 44 | 1.40442 | -0.21374 | -0.16933 |
| H | 48 | 1.04095 | -0.70733 | -0.08159 | C | 45 | 1.41284 | -0.168   | 0.04246  |
| H | 49 | 1.28354 | -0.59731 | 0.094    | C | 46 | 1.34085 | -0.21126 | 0.19719  |
| H | 50 | 1.23619 | -0.62317 | 0.36855  | C | 47 | 1.26337 | -0.29646 | 0.14145  |
| H | 51 | 1.27211 | -0.46328 | 0.21263  | C | 48 | 1.49448 | -0.07556 | 0.1034   |
| H | 52 | 1.16043 | -0.53385 | 0.29557  | N | 1  | 1.72657 | -0.10873 | -0.05748 |
| H | 53 | 1.16571 | -0.4338  | -0.31684 | N | 2  | 1.89373 | -0.01343 | 0.00223  |
| H | 54 | 0.97819 | -0.46651 | 0.30896  | N | 3  | 2.05551 | 0.17352  | 0.05024  |
| H | 55 | 0.89024 | -0.5739  | 0.20866  | N | 4  | 1.73429 | -0.53218 | 0.03472  |
| H | 56 | 0.97811 | -0.56307 | -0.14273 | N | 5  | 1.56303 | -0.70608 | -0.01531 |
| H | 57 | 1.02646 | -0.56925 | 0.11702  | N | 6  | 1.46869 | -0.8807  | -0.05313 |
| H | 58 | 1.04127 | -0.39934 | -0.34079 | N | 7  | 1.49978 | -1.04308 | -0.00115 |
| H | 59 | 1.12399 | -0.29802 | -0.19669 | N | 8  | 1.14674 | -0.70337 | 0.10064  |
| H | 60 | 0.97506 | -0.31661 | -0.16708 | N | 9  | 1.17847 | -0.51764 | -0.06148 |
| H | 61 | 1.0222  | -0.31209 | 0.1031   | N | 10 | 1.09054 | -0.43119 | -0.03902 |
| H | 62 | 1.32336 | -0.33069 | -0.3791  | N | 11 | 0.91394 | -0.44981 | 0.01381  |
| H | 63 | 1.45509 | -0.18476 | -0.28486 | N | 12 | 1.57962 | -0.07663 | 0.0673   |

---

**Table S12.** Fractional atomic coordinates for the unit cell of **COF-BDA-PA** with AA stacking.

| P1 (C1-1)                                                                                                                                                                   |             |         |          |         |         |             |          |          |          |
|-----------------------------------------------------------------------------------------------------------------------------------------------------------------------------|-------------|---------|----------|---------|---------|-------------|----------|----------|----------|
| $a = 9.79 \text{ \AA}$ , $b = 13.96 \text{ \AA}$ , $c = 6.45 \text{ \AA}$ , $\alpha = \beta = 90^\circ$ and $\gamma = 114.6^\circ$ ; $R_p = 3.73 \%$ , $R_{wp} = 4.75 \%$ . |             |         |          |         |         |             |          |          |          |
| Element                                                                                                                                                                     | Atom number | x       | y        | z       | Element | Atom number | x        | y        | z        |
| H                                                                                                                                                                           | 1           | 1.08604 | 0.75821  | 0.7899  | C       | 1           | -1.87297 | -3.21157 | -0.07385 |
| H                                                                                                                                                                           | 2           | 1.09011 | 0.65876  | 0.94929 | C       | 2           | -1.93483 | -3.16959 | 0.11     |
| H                                                                                                                                                                           | 3           | 1.10746 | 0.7642   | 1.26417 | C       | 3           | -1.71293 | -3.00127 | 0.09582  |
| H                                                                                                                                                                           | 4           | 0.94862 | 0.74597  | 1.1184  | C       | 4           | -1.65069 | -3.04176 | -0.09001 |
| H                                                                                                                                                                           | 5           | 1.33714 | 0.93702  | 1.24818 | C       | 5           | -1.61867 | -3.20331 | 0.04952  |
| H                                                                                                                                                                           | 6           | 1.33667 | 1.0402   | 1.09688 | C       | 6           | -1.66276 | -3.31981 | 0.02769  |
| H                                                                                                                                                                           | 7           | 1.47755 | 0.95437  | 0.91913 | C       | 7           | -1.19713 | -3.06619 | 0.18399  |
| H                                                                                                                                                                           | 8           | 1.31931 | 0.93707  | 0.77364 | C       | 8           | -1.3563  | -3.15562 | 0.19623  |
| H                                                                                                                                                                           | 9           | 1.87714 | 0.87852  | 1.31576 | C       | 9           | -1.38552 | -3.14311 | -0.18288 |
| H                                                                                                                                                                           | 10          | 1.80009 | 0.96423  | 1.21798 | C       | 10          | -1.22333 | -3.05566 | -0.19595 |
| H                                                                                                                                                                           | 11          | 1.60222 | 0.80382  | 1.3559  | C       | 11          | -1.71165 | -3.37328 | -0.16288 |
| H                                                                                                                                                                           | 12          | 1.65724 | 0.72433  | 1.19166 | C       | 12          | -1.75921 | -3.48314 | -0.17707 |
| H                                                                                                                                                                           | 13          | 1.55235 | 0.82665  | 0.70528 | C       | 13          | -1.7536  | -3.54412 | -0.00372 |
| H                                                                                                                                                                           | 14          | 1.62246 | 0.73612  | 0.79525 | C       | 14          | -1.69665 | -3.48865 | 0.18387  |
| H                                                                                                                                                                           | 15          | 1.77946 | 0.97747  | 0.82009 | C       | 15          | -1.65577 | -3.37985 | 0.20061  |
| H                                                                                                                                                                           | 16          | 1.82992 | 0.89353  | 0.66306 | C       | 16          | -1.80373 | -3.65554 | -0.01544 |
| H                                                                                                                                                                           | 17          | 1.29045 | 0.62358  | 0.71609 | C       | 17          | -1.79294 | -3.70701 | -0.20055 |
| H                                                                                                                                                                           | 18          | 1.20584 | 0.4376   | 0.69193 | C       | 18          | -1.84642 | -3.81743 | -0.21175 |
| H                                                                                                                                                                           | 19          | 1.32226 | 0.42891  | 1.32089 | C       | 19          | -1.90911 | -3.88158 | -0.03617 |
| H                                                                                                                                                                           | 20          | 1.38632 | 0.61133  | 1.3495  | C       | 20          | -1.91425 | -3.83043 | 0.15068  |
| H                                                                                                                                                                           | 21          | 1.26127 | 0.29121  | 0.67795 | C       | 21          | -1.86738 | -3.72078 | 0.15923  |
| H                                                                                                                                                                           | 22          | 1.16819 | 0.10501  | 0.65887 | C       | 22          | -1.96334 | -3.99944 | -0.04595 |
| H                                                                                                                                                                           | 23          | 1.05386 | 0.08279  | 1.29201 | N       | 1           | -1.8816  | -3.05203 | 0.10409  |
| H                                                                                                                                                                           | 24          | 1.12453 | 0.26623  | 1.30507 | N       | 2           | -1.70436 | -3.15956 | -0.08875 |
| H                                                                                                                                                                           | 25          | 1.06763 | -0.06407 | 0.80775 | N       | 3           | -1.45116 | -3.14263 | 0.02642  |
| H                                                                                                                                                                           | 26          | 0.35682 | 0.76599  | 1.21612 | N       | 4           | -1.12973 | -3.06762 | -0.02322 |
